# Supplementary material
Source: publisher figshare collection journal article supplement (https://brill.figshare.com/articles/dataset/_/26399209)
Supplement: Supplementary file 1 [file 1]

## Short Note

First record of male-male combat in the Yellow-bellied Puffing

Snake *Spilotes sulphureus* (Wagler, 1824)

Gabrieli Araújo<sup>1,2,\*</sup>, Renan Ramalho<sup>1,2</sup>, Selma Almeida-Santos<sup>1,2</sup>

1 - IBILCE-UNESP, Instituto de Biociências, Letras e Ciências Exatas, Universidade Estadual Paulista “Júlio de Mesquita Filho”, R. Cristóvão Colombo, 2265, 15054-000,

Jardim Nazareth, São José do Rio Preto, SP, Brazil

2 - LEEV-IB, Laboratório de Ecologia e Evolução, Instituto Butantan, Av. Vital Brazil, 1500, 05503-900, São Paulo, SP, Brazil

\*Corresponding author; e-mail: [gabrieli.araujo@unesp.br](mailto:gabrieli.araujo@unesp.br)

### Supplementary material

**Video S1.** Complete record of combat behaviour.

**Table S1.** Observed displays in timestamps during the record of male-male combat in *S. sulphureus* in Rio de Janeiro state, southeastern Brazil.

| Time of the video (min) | Observed display                                    |
|-------------------------|-----------------------------------------------------|
| 00:02                   | Vertical display                                    |
| 00:04                   | Tumble                                              |
| 00:06                   | Recovery                                            |
| 00:11                   | Vertical display, gular inflation and tumble        |
| 00:12                   | Recovery, gular inflation and neck S-coil           |
| 00:13                   | Gular inflation                                     |
| 00:14                   | Dorsal hyperextension and gular inflation           |
| 00:18                   | Downward push                                       |
| 00:19                   | Gular inflation                                     |
| 00:20                   | Tumble and recovery                                 |
| 00:22                   | Gular inflation                                     |
| 00:27                   | Neck S-coil                                         |
| 00:28                   | Vertical orientation                                |
| 00:36                   | Dorsal hyperextension and latero-lateral flattening |
| 00:37                   | Latero-lateral flattening                           |
| 00:38                   | Vertical orientation                                |
| 00:48                   | Gular inflation                                     |
| 00:50                   | Gular inflation                                     |
| 00:51                   | Dorsal hyperextension                               |
| 00:54 - 00:58           | Gular inflation                                     |
| 01:11                   | Gular inflation                                     |
| 01:12 - 01:13           | Vertical orientation and gular inflation            |
| 01:15                   | Tongue-flicking                                     |
| 01:26                   | Latero-lateral flattening                           |
| 01:31                   | Pinning                                             |
| 01:32 - 01:34           | Latero-lateral flattening                           |
| 01:35                   | Vertical orientation                                |
| 01:37 - 01:40           | Gular inflation                                     |
| 01:43                   | Pinning and neck S-coil                             |
| 01:44 - 01:46           | Neck S-coil                                         |
| 01:49                   | Vertical orientation                                |
| 01:56                   | Gular inflation                                     |
| 01:58 - 01:59           | Latero-lateral flattening                           |
| 02:01                   | Gular inflation                                     |
| 02:42                   | Vertical display and orientation                    |
| 02:44                   | Lyre-shaped                                         |
| 02:48                   | Vertical display and orientation                    |
| 02:53                   | Dorsal hyperextension and tumble                    |
| 02:54                   | Recovery                                            |
| 03:06                   | Vertical orientation                                |
| 03:11                   | Gular inflation                                     |
| 03:12 - 03:14           | Vertical orientation and gular inflation            |
| 03:18 - 03:19           | Vertical orientation and gular inflation            |
| 03:20 - 03:21           | Gular inflation and neck S-coil                     |

|               |                                           |
|---------------|-------------------------------------------|
| 03:22 - 03:24 | Vertical orientation and gular inflation  |
| 03:27         | Dorsal hyperextension attempt *           |
| 03:28 - 03:31 | Gular inflation                           |
| 03:32 - 03:33 | Neck S-coil and latero-lateral flattening |
| 03:34 - 04:46 | Vertical display and orientation          |

---

\* During this display, one of the males lost his balance and fell onto the other, knocking him down.
